# Supplementary material
Source: PubMed Central journal article supplement (PMC2327254)
Supplement: NIHMS44985-supplement-01.pdf [file NIHMS44985-supplement-01.pdf]

Supplemental Figure 1. Signal change in caudate head VOI in motor-control and no-penalty trials

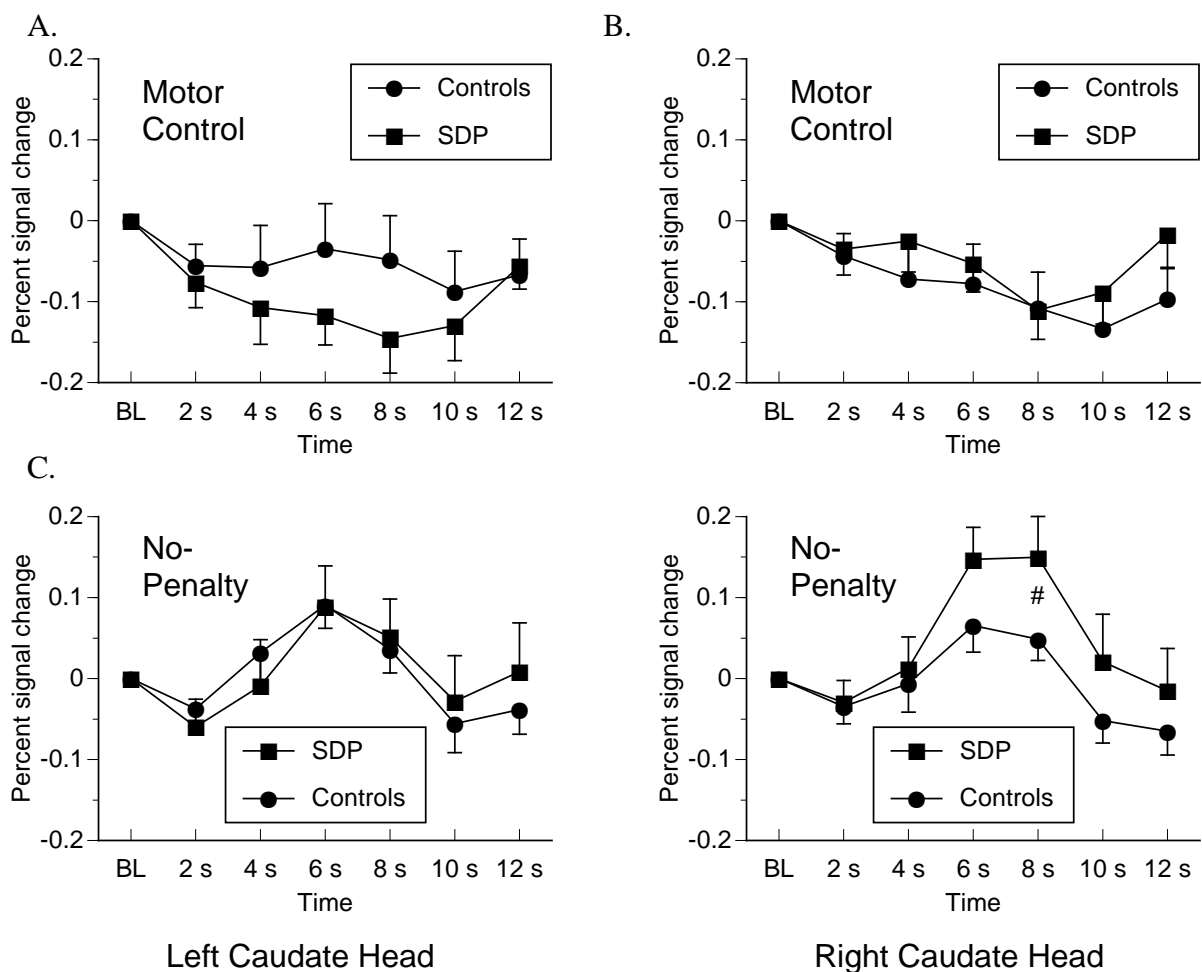

Supplemental Figure 1. To characterize caudate head activation by the linear contrast (LC) between accrual of guaranteed reward and motor-control trials in SPD, BOLD signal across motor-control trials (A, B) and no-penalty (guaranteed reward) trials (C, D) was extracted from 3mm radius VOI centered at Tlrc -11 11 -1 in left caudate head and Tlrc 10 14 -1 in right caudate head. These were the LC activation maxima in SPD (see Table 1). Extracted signal data indicated that activation in the left caudate by this LC in SPD (but not controls) resulted from relatively more deactivation in non-incentive motor-control trials (A), with similar BOLD responses to guaranteed reward accrual in both groups (C). In contrast, in right caudate head, LC activation in SPD but not controls resulted not from differences in signal change during motor control trials (B), but rather from SPD having a trend toward a greater peak signal change in no-penalty reward trials (D). There were no significant group by time interaction effects on BOLD signal, however, in either VOI for either trial type. # denotes  $P < .10$ .
