# Supplementary material
Source: PubMed Central journal article supplement (PMC2327254)
Supplement: NIHMS44985-supplement-02.pdf [file NIHMS44985-supplement-02.pdf]

Supplementary materials for the article “Reduced posterior mesofrontal cortex activation  
by risky rewards in substance-dependent patients”

published in *Drug and Alcohol Dependence*

James M. Bjork, Reza Momenan, Ashley R. Smith, Daniel W. Hommer

Laboratory of Clinical and Translational Studies

National Institute on Alcohol Abuse and Alcoholism

Bethesda, MD 20892 USA

This material supplements but does not replace the content of the peer-reviewed paper  
published in *Drug and Alcohol Dependence*.

For more information contact Dr. James M. Bjork, NIAAA/NIH, 10 Center Drive, CRC  
Room 1-5330, Bethesda, MD 20892; Phone: 301-594-9950; Fax: 301-402-0445;  
Email: [bjork@mail.nih.gov](mailto:bjork@mail.nih.gov)

Supplemental Table 1. Demographics and DSM-IV Diagnoses of Substance-Dependent Patients

| Sex    | Age | Axis I                                                                                                                                                                                                                                                                                                                       | Axis II                                                                  |
|--------|-----|------------------------------------------------------------------------------------------------------------------------------------------------------------------------------------------------------------------------------------------------------------------------------------------------------------------------------|--------------------------------------------------------------------------|
| Female | 26  | Alcohol Dependence<br>Cocaine Dependence<br>Cannabis Dependence<br>Stimulant Dependence<br>Hallucinogen Dependence<br>Nicotine Dependence<br>Other/Unknown Substance Dependence<br>Substance-Induced MD<br>PTSD<br>Specific Phobia<br>Anxiety Disorder, NOS<br>ADHD, Combined Type                                           | Paranoid PD<br>Narcissistic PD<br>Borderline PD<br>Antisocial PD<br>PAPD |
| Female | 33  | Alcohol Dependence<br>MJPD (past)<br>Panic Disorder, without Agoraphobia<br>Panic Disorder, without Agoraphobia (past)<br>PTSD (past)<br>Substance-Induced Anxiety Disorder<br>Substance-Induced MD<br>Cannabis Dependence (past)<br>Cocaine Dependence (past)<br>Amphetamine Dependence (past)<br>Hallucinogen Abuse (past) | None                                                                     |
| Female | 41  | Alcohol Dependence<br>Alcohol-Induced AD (past)<br>Nicotine Dependence<br>Cocaine Dependence                                                                                                                                                                                                                                 | None                                                                     |
| Female | 37  | Alcohol Dependence<br>Specific Phobia<br>Adjustment Disorder (past)<br>Opioid Abuse (past)<br>Amphetamine Abuse (past)<br>Cocaine Dependence<br>Cannabis Dependence<br>Hallucinogen Dependence                                                                                                                               | None                                                                     |
| Female | 40  | Alcohol Dependence<br>Other Substance-Induced MD<br>Agoraphobia, without panic attack<br>Cocaine Dependence                                                                                                                                                                                                                  | Paranoid PD                                                              |
| Female | 46  | Substance-Induced MD<br>Panic Disorder, without Agoraphobia<br>Specific Phobia<br>Cocaine Dependence<br>Alcohol Dependence<br>Opioid Dependence<br>Amphetamine Abuse<br>Hallucinogen Abuse<br>Cannabis Abuse                                                                                                                 | Avoidant PD<br>Antisocial PD<br>OCPD<br>Dependent PD                     |

| Sex    | Age | Axis I                                                                                                                                                                                                                                                                 | Axis II                                                                                        |
|--------|-----|------------------------------------------------------------------------------------------------------------------------------------------------------------------------------------------------------------------------------------------------------------------------|------------------------------------------------------------------------------------------------|
| Female | 39  | Alcohol-Induced AD<br>Alcohol Dependence<br>Amphetamine-Induced MD<br>Cocaine Dependence<br>Cocaine Dependence (past)<br>Other Substance Dependence (past)                                                                                                             | None                                                                                           |
| Male   | 18  | Amphetamine-Induced MD<br>Alcohol Dependence<br>Obsessive-Compulsive Disorder<br>Alcohol-Induced AD<br>Cocaine Dependence<br>Cannabis Dependence                                                                                                                       | None                                                                                           |
| Male   | 25  | Cannabis Dependence<br>Alcohol Dependence<br>Cocaine Abuse (past)                                                                                                                                                                                                      | Paranoid PD<br>Antisocial PD                                                                   |
| Male   | 23  | Specific Phobia<br>Alcohol Dependence<br>Amphetamine-Induced MD<br>Cannabis Dependence<br>Cocaine Dependence<br>Caffeine Intoxication (past)<br>Nicotine Dependence<br>Amphetamine Intoxication                                                                        | PD, NOS                                                                                        |
| Male   | 33  | Alcohol-Induced AD<br>Alcohol Dependence<br>Amphetamine-Induced Psychotic Disorder<br>Agoraphobia, without panic attack<br>Social Phobia<br>Specific Phobia<br>Cannabis Dependence<br>Cocaine Dependence<br>Hallucinogen Dependence (past)<br>Amphetamine Intoxication | Antisocial PD                                                                                  |
| Male   | 35  | Alcohol-Induced AD<br>Amphetamine-Induced MD<br>Alcohol Dependence<br>Cannabis Dependence (past)<br>Opioid Dependence (past)<br>Hallucinogen Dependence (past)<br>Cocaine Dependence                                                                                   | Antisocial PD<br>PD, NOS                                                                       |
| Male   | 41  | MJDP<br>Alcohol Dependence<br>OCD<br>Opioid Abuse (past)<br>Cocaine Abuse                                                                                                                                                                                              | None                                                                                           |
| Male   | 26  | PTSD (past)<br>PTSD<br>Anxiety Disorder NOS<br>Alcohol-Induced MD (past)<br>Alcohol-Induced MD<br>Other-Induced MD (past)<br>Other-Induced MD<br>Alcohol Dependence<br>Cocaine Dependence (past)<br>Cocaine Dependence                                                 | Avoidant PD<br>Narcissistic PD<br>Paranoid PD<br>Dependent PD<br>OCPD<br>PAPD<br>Depressive PD |

| Gender | Age | Nicotine Dependence<br>Axis I                                                                                                                                                                                                                                                                                                                                                                                                                                                                         | Axis II                                                                                                           |
|--------|-----|-------------------------------------------------------------------------------------------------------------------------------------------------------------------------------------------------------------------------------------------------------------------------------------------------------------------------------------------------------------------------------------------------------------------------------------------------------------------------------------------------------|-------------------------------------------------------------------------------------------------------------------|
| Male   | 34  | MJDP<br>MJPD (past)<br>Amphetamine-Induced MD<br>Generalized Anxiety Disorder<br>Amphetamine-Induced Psychotic Disorder<br>Alcohol-Induced Psychotic Disorder<br>Panic Disorder, with Agoraphobia<br>Obsessive-Compulsive Disorder<br>Social Phobia<br>ADHD (past)<br>ADHD<br>Specific Phobia<br>Alcohol Dependence<br>SHA Abuse (past)<br>SHA Abuse<br>SHA Dependence (past)<br>Cannabis Dependence (past)<br>Cocaine Dependence (past)<br>Amphetamine Dependence (past)<br>Opioid Dependence (past) | Avoidant PD<br>Dependent PD<br>Paranoid PD<br>Schizotypal PD<br>Narcissistic PD<br>Borderline PD<br>Antisocial PD |
| Male   | 43  | Amphetamine-Induced MD<br>MJDP<br>Hallucinogen Abuse<br>Cocaine Dependence<br>Cannabis Dependence<br>Opioid Dependence<br>Alcohol Dependence                                                                                                                                                                                                                                                                                                                                                          | Narcissistic PD<br>OCPD<br>Paranoid PD<br>PD, NOS                                                                 |
| Male   | 32  | Cocaine Dependence<br>Alcohol Dependence<br>Cannabis Dependence (past)                                                                                                                                                                                                                                                                                                                                                                                                                                | None                                                                                                              |

AD-Anxiety Disorder, ADHD –Attention Deficit-Hyperactivity Disorder, MD-Mood Disorder, MJDP-Major Depression Unspecified, NOS-Not Otherwise Specified, OCD- Obsessive-Compulsive Disorder, OCPD-Obsessive-Compulsive Personality Disorder, PAPD- Passive Aggressive Personality Disorder, PD-Personality Disorder, PTSD-Post Traumatic Stress Disorder, SHA-Sedative, Hypnotic, or Anxiolytic

Supplemental table 2. NEO-Five Factor Inventory scores (mean and SD)

| Scale:                   | Controls (n =15) | SDP (n = 17) | t(30) | <i>P</i> |
|--------------------------|------------------|--------------|-------|----------|
| Neuroticism factor       | 43.9 (12.5)      | 60.1 (9.9)   | 4.10  | <.001    |
| Extraversion factor      | 45.9 (10.0)      | 55.9 (10.6)  | 2.71  | <.05     |
| Openness factor          | 53.7 (11.7)      | 48.8 (10.1)  | 1.28  | n.s.     |
| Agreeableness factor     | 50.5 (10.0)      | 39.4 (11.9)  | 2.83  | <.01     |
| Conscientiousness factor | 50.6 (9.8)       | 40.8 (9.6)   | 2.85  | <.01     |
| Impulsivity facet        | 43.8 (9.2)       | 57.2 (8.6)   | 4.25  | < .001   |
